# Supplementary material
Source: ML conference proceedings conference paper supplement (https://openaccess.thecvf.com/content/CVPR2024/html/Shabanov_BANF_Band-Limited_Neural_CVPR_2024_paper.html)
Supplement: Supplementary file 3 [file Shabanov_BANF_Band-Limited_Neural_CVPR_2024_supplemental.zip]

Archive with 4 entries (4 files):
- BANF_supp.pdf
- __MACOSX/._BANF_supp.pdf
- video-BANF.mp4
- __MACOSX/._video-BANF.mp4
